# Supplementary material
Source: PubMed Central journal article supplement (PMC4033576)
Supplement: NIHMS584072-supplement-Suppl__Material.pdf [file NIHMS584072-supplement-Suppl__Material.pdf]

## Supplementary Materials for

### Pharmacological Inhibition of a MicroRNA Family in Nonhuman Primates by a Seed-Targeting 8-Mer AntimiR

Veerle Rottiers, Susanna Obad, Andreas Petri, Robert McGarrah, Marie W. Lindholm, Joshua C. Black, Sumita Sinha, Robin J. Goody, Matthew S. Lawrence, Andrew S. deLemos, Henrik F. Hansen, Steve Whittaker, Steve Henry, Rohn Brookes, Seyed Hani Najafi-Shoushtari, Raymond T. Chung, Johnathan R. Whetstone, Robert E. Gerszten, Sakari Kauppinen,\* Anders M. Näär\*

\*Corresponding author. E-mail: naar@helix.mgh.harvard.edu (A.M.N.); sk@bio.aau.dk (S.K.)

Published 20 November 2013, *Sci. Transl. Med.* **5**, 212ra162 (2013)

DOI: 10.1126/scitranslmed.3006840

#### This PDF file includes:

- Fig. S1. ABCA1 mRNA in HepG2 cells and total cholesterol in mice after treatment with control oligonucleotides.
- Fig. S2. Hepatic ABCA1 protein in African green monkeys after treatment with antimiR-33a, antimiR-33b, or antimiR-33a/b.
- Fig. S3. Plasma glucose and insulin concentrations in vehicle- and antimiR-33–treated African green monkeys.
- Fig. S4. Quantification of hepatic miR-33a and miR-33b in control African green monkeys.
- Fig. S5. Plasma triglyceride concentrations in antimiR-33–treated African green monkeys.
- Fig. S6. Clinical chemistry measurements in antimiR-33a/b– and vehicle-treated African green monkeys.
- Table S1. Characteristics of the LNA-modified antimiRs used in this study.
- Table S2 legend
- Table S3. Weight of the African green monkeys at the start of the study.
- Table S4. Predicted miR-33 targets with increased expression after antimiR-33a/b treatment.
- Table S5. Pharmacokinetic properties of the 8-mer antimiR-33a/b oligonucleotide.
- Table S6. Assessment of liver steatosis after treatment with the 8-mer LNA-modified antimiR-33a/b.
- Table S7. GO term analysis of genes with changed expression after antimiR-33a/b treatment.

**Other Supplementary Material for this manuscript includes the following:**  
(available at  
[www.sciencetranslationalmedicine.org/cgi/content/full/5/212/212ra162/DC1](http://www.sciencetranslationalmedicine.org/cgi/content/full/5/212/212ra162/DC1))

Table S2. Raw data and *P* values for data with a sample size of  $n < 20$  (provided separately in an Excel file).

**Supplementary material for Rottiers et al.**

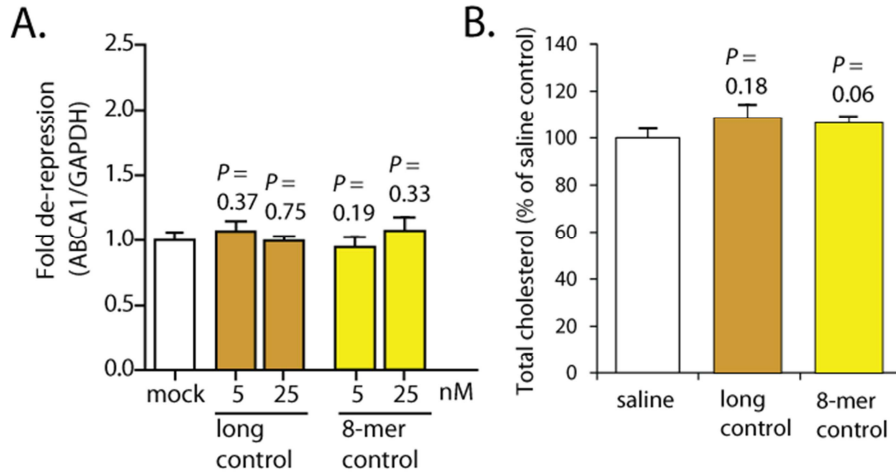

**Fig. S1. ABCA1 mRNA in HepG2 cells and total cholesterol in mice after treatment with control oligonucleotides.** (A) Transfection with scrambled long LNA/DNA or 8-mer LNA control oligonucleotides (5 nM or 25 nM) does not affect ABCA1 mRNA expression in HepG2 cells. (B) Treatment with scrambled control oligonucleotides does not alter circulating total cholesterol in mice.

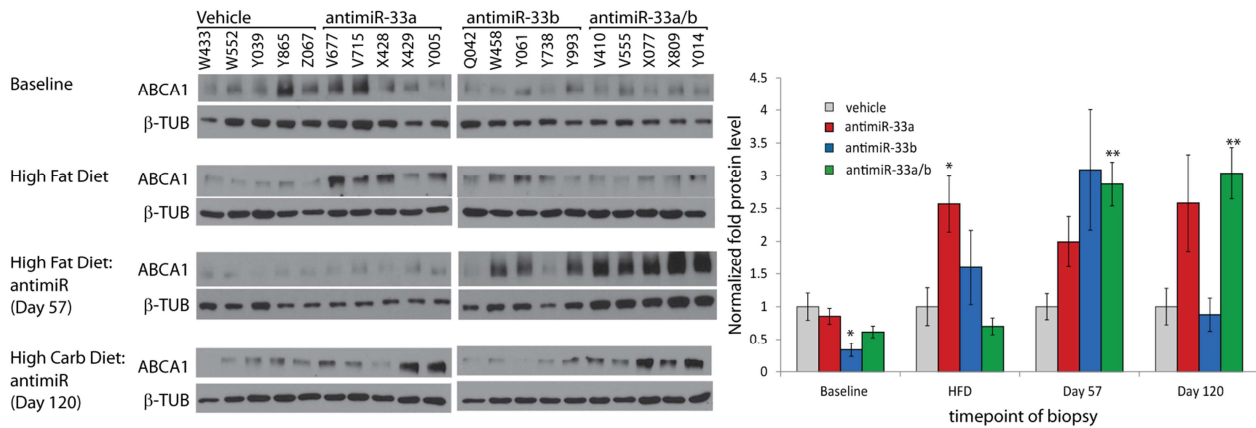

**Fig. S2. Hepatic ABCA1 protein in African green monkeys after treatment with antimiR-33a, antimiR-33b or antimiR-33a/b.**

Error bars represent standard error of the mean (SEM). Statistical analysis was performed with

Student's t-test.  $P = 0.02$  (Baseline; antimiR-33b),  $0.02$  (HFD; antimiR-33a),  $0.001$  (Day 57; antimiR-33a/b) and  $0.003$  (Day 120; antimiR-33a/b).

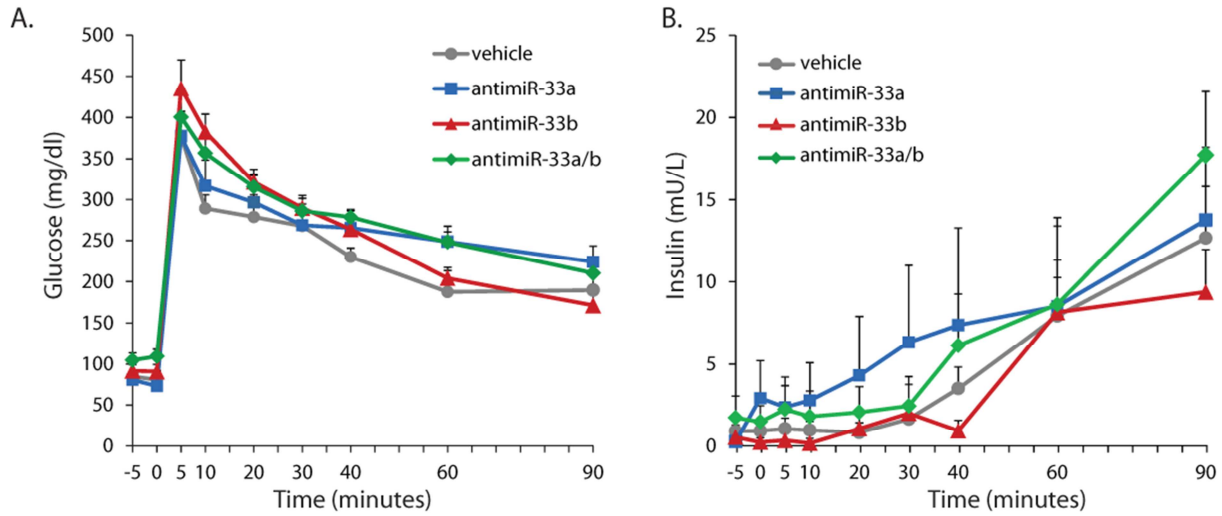

**Fig. S3. Plasma glucose and insulin concentrations in vehicle- and antimiR-33-treated African green monkeys.** The non-human primates in this study displayed a hyperglycemic and insulin-resistant phenotype. Intravenous Glucose Tolerance Test (IVGTT) to assess glucose regulation (A) and measurements of insulin (B) on study Day 120 indicate that the African green monkeys in our study demonstrated poor glucose and insulin responses. Error bars represent SEM.

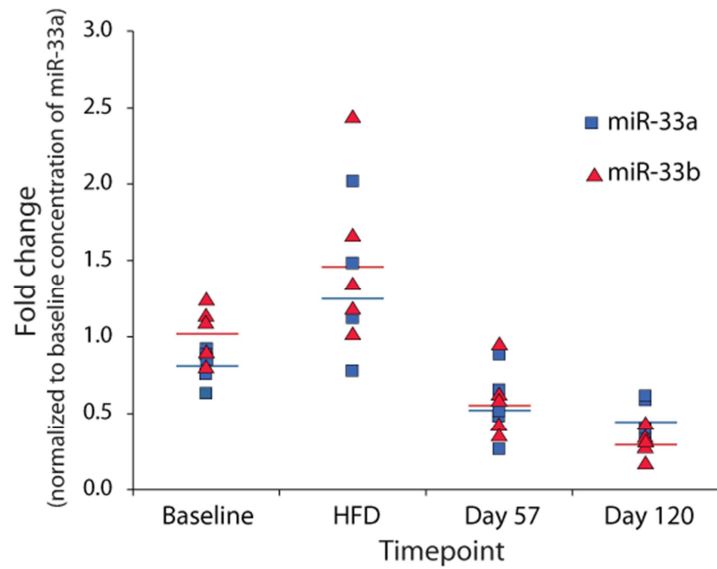

**Fig. S4. Quantification of hepatic miR-33a and miR-33b in control African green monkeys.**

The lack of increase in miR-33b expression in response to the shift to a high-carbohydrate diet is consistent with low insulin levels. Lines represent the mean values of 5 monkeys per time-point.

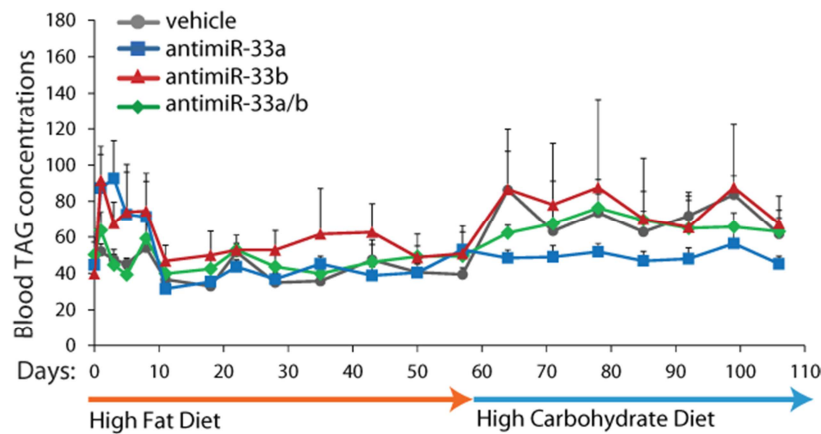

**Fig. S5: Plasma triglyceride concentrations in antimiR-33–treated African green monkeys.**

Triglyceride (TAG) concentrations were not significantly changed by the antimiR compounds targeting miR-33 family members in this non-human primate study. Error bars represent SEM.

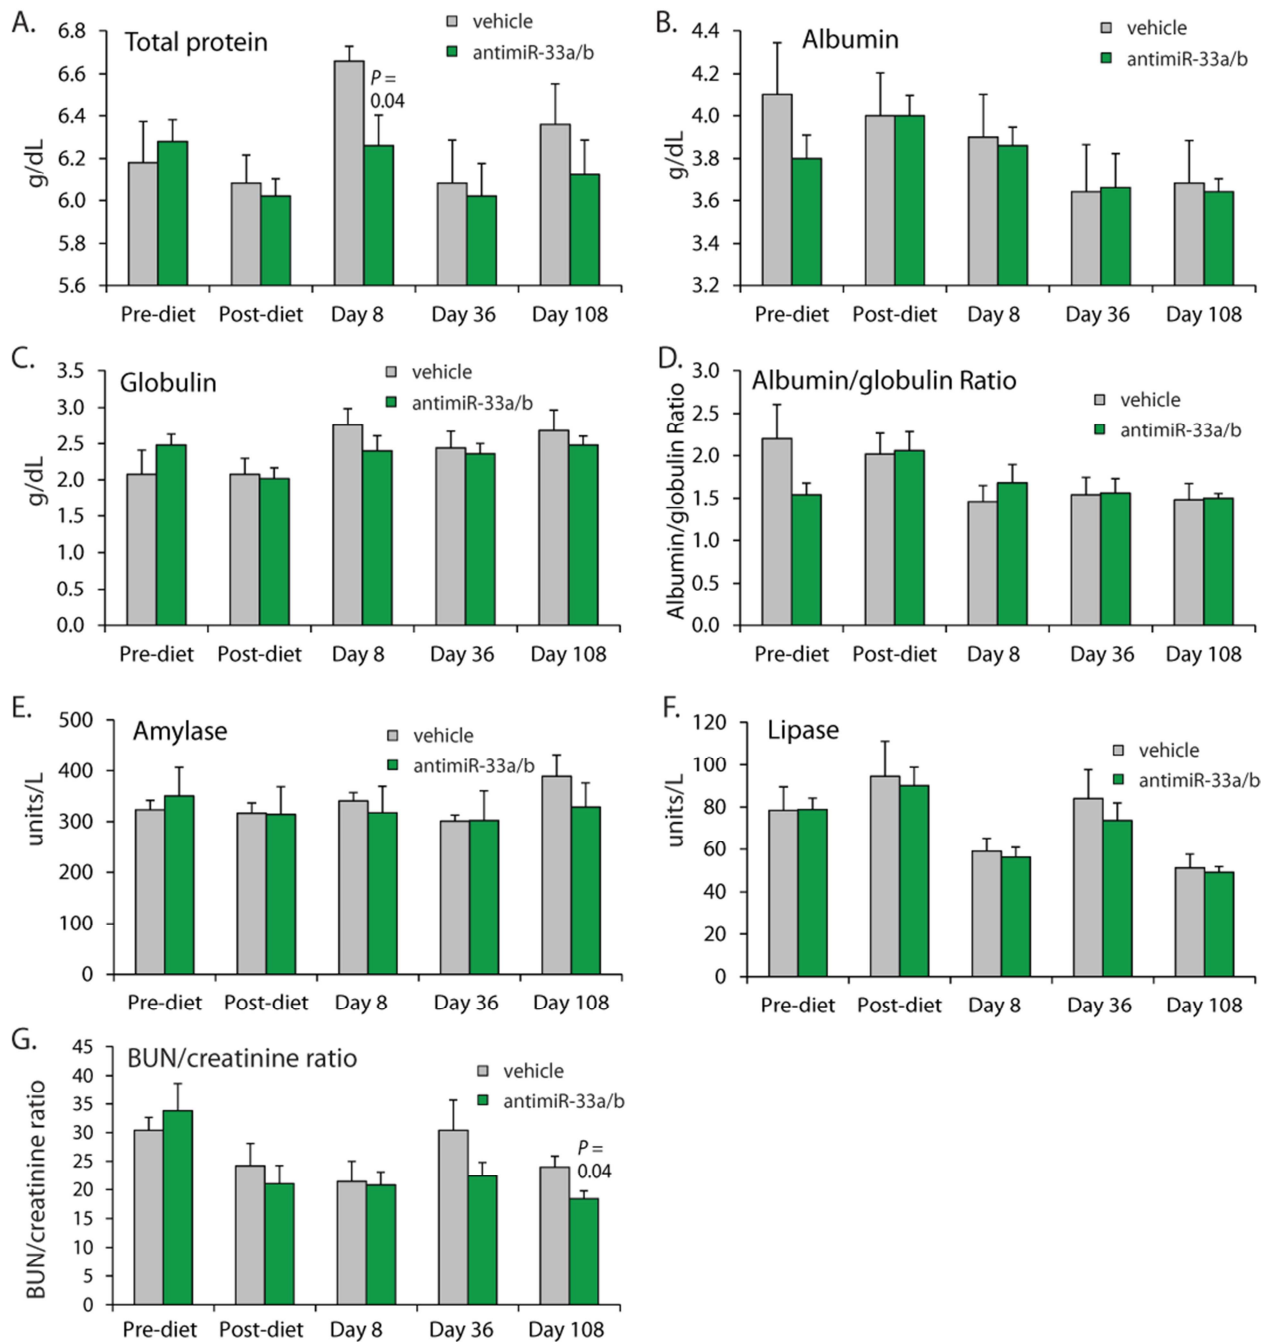

**Fig. S6. Clinical chemistry measurements in antimicro-33a/b- and vehicle-treated African green monkeys. (A) Total protein. (B) Albumin. (C) Globulin. (D) Albumin/globulin ratio. (E) Amylase. (F) Lipase. (G) BUN/creatinine ratio. Error bars represent SEM. Statistical analysis was performed with Student's t-test comparing treatment and vehicle control.**

**Table S1. Characteristics of the LNA-modified antimiRs used in this study.**

| name          | sequence               | length (nt) | T <sub>m</sub> (°C) miR-33a | T <sub>m</sub> (°C) miR-33b | ΔT <sub>m</sub> | IC <sub>50</sub> (nM) miR-33a | IC <sub>50</sub> (nM) miR-33b | ΔIC <sub>50</sub> |
|---------------|------------------------|-------------|-----------------------------|-----------------------------|-----------------|-------------------------------|-------------------------------|-------------------|
| antimiR-33a   | 5' atgcaactacaatgca 3' | 16          | 72                          | 51                          | 21              | 0.04                          | 9.9                           | 248x              |
| antimiR-33b   | 5' atgcaacagcaatgca 3' | 16          | 54                          | 76                          | 22              | 8.4                           | 1.3                           | 6.5x              |
| antimiR-33a/b | 5' acaatgca 3'         | 8           | 66                          | 58                          | 8               | 0.54                          | 0.47                          | 1.1x              |

**Table S2. Raw data and *P* values for data with a sample size of *n* < 20 (provided separately in an Excel file).****Table S3. Weight of the African green monkeys at the start of the study.**

| Animal ID | Treatment Group | Baseline (kg) | % weight over normal |
|-----------|-----------------|---------------|----------------------|
| W433      | Vehicle         | 4.46          | 49                   |
| W552      | Vehicle         | 4.10          | 37                   |
| Y039      | Vehicle         | 3.71          | 24                   |
| Y865      | Vehicle         | 5.38          | 79                   |
| Z067      | Vehicle         | 4.78          | 59                   |
| V410      | antimiR-33a/b   | 4.74          | 58                   |
| V555      | antimiR-33a/b   | 4.18          | 39                   |
| X077      | antimiR-33a/b   | 4.32          | 44                   |
| X809      | antimiR-33a/b   | 5.27          | 76                   |
| Y014      | antimiR-33a/b   | 4.61          | 54                   |
| Q042      | antimiR-33b     | 5.39          | 80                   |
| W458      | antimiR-33b     | 6.04          | 101                  |
| Y061      | antimiR-33b     | 3.51          | 17                   |
| Y738      | antimiR-33b     | 5.35          | 78                   |
| Y993      | antimiR-33b     | 5.41          | 80                   |
| V677      | antimiR-33a     | 4.36          | 45                   |
| V715      | antimiR-33a     | 4.69          | 56                   |
| X428      | antimiR-33a     | 5.29          | 76                   |
| X429      | antimiR-33a     | 5.06          | 69                   |
| Y005      | antimiR-33a     | 4.84          | 61                   |
|           | Average         | 4.77          | 59                   |
|           | Stdev           | 0.6           | 21                   |

Weight of all animals at the start of the study (Baseline) sorted by the cohort group assigned after the HFD period. Percentage weight over normal weight was calculated as % weight of the

monkey over 3 kg (=normal female African green monkey weight as determined by Liddie et al. (27)).

**Table S4. Predicted miR-33 targets with increased expression after anti-miR-33a/b treatment.**

| Gene Symbol   | p-value      | Fold        | Description                                                                                       |
|---------------|--------------|-------------|---------------------------------------------------------------------------------------------------|
| SEC63         | 0.003        | 1.74        | SEC63 homolog ( <i>S. cerevisiae</i> )                                                            |
| HNRPA2B1      | 0.001        | 1.66        | heterogeneous nuclear ribonucleoprotein A2/B1                                                     |
| <b>CROT</b>   | <b>0.013</b> | <b>1.60</b> | <b>carnitine O-octanoyltransferase</b>                                                            |
| SNRK          | 0.000        | 1.52        | SNF related kinase                                                                                |
| PJA2          | 0.002        | 1.49        | praja ring finger 2, E3 ubiquitin protein ligase                                                  |
| CD302         | 0.003        | 1.47        | CD302 molecule                                                                                    |
| EIF2S2        | 0.003        | 1.45        | eukaryotic translation initiation factor 2, subunit 2 beta, 38kDa                                 |
| AHCYL1        | 0.004        | 1.44        | adenosylhomocysteinase-like 1                                                                     |
| MTDH          | 0.005        | 1.42        | metadherin                                                                                        |
| STS           | 0.040        | 1.42        | steroid sulfatase (microsomal), isozyme S                                                         |
| HNRPA3        | 0.000        | 1.42        | heterogeneous nuclear ribonucleoprotein A3                                                        |
| NFIA          | 0.005        | 1.42        | nuclear factor I/A                                                                                |
| DUSP6         | 0.024        | 1.41        | dual specificity phosphatase 6                                                                    |
| REXO2         | 0.012        | 1.40        | REX2, RNA exonuclease 2 homolog ( <i>S. cerevisiae</i> )                                          |
| EEF1A1        | 0.000        | 1.40        | eukaryotic translation elongation factor 1 alpha 1                                                |
| CROP          | 0.002        | 1.38        | LUC7-like 3 ( <i>S. cerevisiae</i> )                                                              |
| MORF4L1       | 0.005        | 1.38        | mortality factor 4 like 1                                                                         |
| NDN           | 0.007        | 1.38        | needin homolog (mouse)                                                                            |
| QKI           | 0.005        | 1.38        | QKI, KH domain containing, RNA binding                                                            |
| SMAD2         | 0.001        | 1.38        | SMAD family member 2                                                                              |
| <b>PRKAA1</b> | <b>0.035</b> | <b>1.38</b> | <b>protein kinase, AMP-activated, alpha 1 catalytic subunit</b>                                   |
| SFRS12        | 0.000        | 1.37        | splicing regulatory glutamine/lysine-rich protein 1                                               |
| <b>ABCA1</b>  | <b>0.008</b> | <b>1.37</b> | <b>ATP-binding cassette, sub-family A (ABC1), member 1</b>                                        |
| BACH1         | 0.001        | 1.36        | BTB and CNC homology 1, basic leucine zipper transcription factor 1                               |
| ROBO2         | 0.001        | 1.36        | roundabout, axon guidance receptor, homolog 2 ( <i>Drosophila</i> )                               |
| C9orf10       | 0.001        | 1.36        | family with sequence similarity 120A                                                              |
| SMARCA5       | 0.001        | 1.36        | SWI/SNF related, matrix associated, actin dependent regulator of chromatin, subfamily a, member 5 |
| TBC1D15       | 0.034        | 1.35        | TBC1 domain family, member 15                                                                     |
| ACF           | 0.000        | 1.35        | APOBEC1 complementation factor                                                                    |
| ZFP36L1       | 0.044        | 1.34        | zinc finger protein 36, C3H type-like 1                                                           |



|          |       |      |                                                        |
|----------|-------|------|--------------------------------------------------------|
| TPM3     | 0.000 | 1.34 | tropomyosin 3                                          |
| TNRC6C   | 0.000 | 1.33 | trinucleotide repeat containing 6C                     |
| YTHDF3   | 0.003 | 1.33 | YTH domain family, member 3                            |
| KIAA1432 | 0.000 | 1.32 | KIAA1432                                               |
| AXL      | 0.034 | 1.32 | AXL receptor tyrosine kinase                           |
| NRIP1    | 0.003 | 1.31 | nuclear receptor interacting protein 1                 |
| CHES1    | 0.003 | 1.30 | forkhead box N3                                        |
| DDX5     | 0.029 | 1.30 | DEAD (Asp-Glu-Ala-Asp) box helicase 5                  |
| TFDP2    | 0.000 | 1.30 | transcription factor Dp-2 (E2F dimerization partner 2) |
| NAALADL2 | 0.002 | 1.30 | N-acetylated alpha-linked acidic dipeptidase-like 2    |
| CDC2L6   | 0.002 | 1.29 | cyclin-dependent kinase 19                             |
| UBE2V2   | 0.001 | 1.29 | ubiquitin-conjugating enzyme E2 variant 2              |
| NCOA3    | 0.007 | 1.28 | nuclear receptor coactivator 3                         |
| EDD1     | 0.004 | 1.28 | ubiquitin protein ligase E3 component n-recogin 5      |
| HSPA8    | 0.022 | 1.28 | heat shock 70kDa protein 8                             |
| SBNO1    | 0.000 | 1.28 | strawberry notch homolog 1 (Drosophila)                |
| SPIN     | 0.010 | 1.28 | spindlin 1                                             |
| HAS3     | 0.002 | 1.27 | hyaluronan synthase 3                                  |
| DDX3X    | 0.001 | 1.27 | DEAD (Asp-Glu-Ala-Asp) box polypeptide 3, X-linked     |
| ANKRD28  | 0.003 | 1.27 | ankyrin repeat domain 28                               |
| PCDH7    | 0.000 | 1.26 | protocadherin 7                                        |
| WDR42A   | 0.007 | 1.26 | DDB1 and CUL4 associated factor 8                      |
| PAPOLG   | 0.000 | 1.26 | poly(A) polymerase gamma                               |
| NAP1L4   | 0.002 | 1.25 | nucleosome assembly protein 1-like 4                   |

Expression changes of predicted miR-33 targets in the livers of African green monkeys treated with the 8-mer antimiR-33a/b versus vehicle at the HFD:antimiR time point. Gene expression data were obtained from the NimbleGen DNA microarray analysis, 5 liver samples per group. Analysis was performed with Genespring GX 11.0 software. The gene list of predicted miR-33a/b human targets was obtained using TargetScan 6.2 (<http://www.targetscan.org/>) and imported into the Genespring GX 11.0 software. *P*-values are uncorrected. Previously described targets are marked in yellow (14, 15, 18, 19, 26).

**Table S5. Pharmacokinetic properties of the 8-mer antimiR-33a/b oligonucleotide.**

|                                           |      |
|-------------------------------------------|------|
| $C_{\max}$ [ng/mL]                        | 16.6 |
| $AUC_t$ [ $\mu\text{g}\cdot\text{h/mL}$ ] | 5.90 |
| Terminal half-life, $t_{1/2}$ [days]      | 17.5 |
| $V_z$ [L/kg]                              | 408  |
| Cl [mL/h/kg]                              | 674  |

Pharmacokinetic properties of subcutaneously administered antimiR-33a/b in obese African green monkeys.  $C_{\max}$ , maximum observed plasma concentration;  $AUC_t$ , area under concentration versus time curve from time 0 to 50 days after the last dose;  $V_z$ , apparent volume of distribution during the terminal phase; Cl, total body clearance. Data are from times after the last dose on Day 106 and show mean values for 5 animals.

**Table S6. Assessment of liver steatosis after treatment with the 8-mer LNA-modified antimiR-33a/b.**

|               | Vehicle | SEM  | antimiR-33a/b | SEM  |
|---------------|---------|------|---------------|------|
| Baseline      | 0.60    | 0.21 | 1.01          | 0.37 |
| High Fat Diet | 0.79    | 0.61 | 1.46          | 0.73 |
| HFD:antimiR   | 2.32    | 0.84 | 3.30          | 1.06 |
| HCD:antimiR   | 1.05    | 0.47 | 2.13          | 0.38 |

No increase in hepatic steatosis was observed after treatment with the antimiR-33a/b compound. Average percentages of steatosis for the vehicle or antimiR-33a/b-treated animals are indicated for the four liver biopsy time points (Baseline, High Fat Diet, High Fat Diet:antimiR, High Carb Diet:antimiR).

**Table S7. GO term analysis of genes with changed expression after antimiR-33a/b treatment.**

| GO ID | GO Term                                             | p-value  | corrected p-value |
|-------|-----------------------------------------------------|----------|-------------------|
| 5226  | metabolic process                                   | 3.27E-16 | 0.000             |
| 18751 | cellular metabolic process                          | 1.83E-14 | 0.000             |
| 18752 | primary metabolic process                           | 6.58E-13 | 0.000             |
| 11078 | carboxylic acid metabolic process                   | 1.81E-10 | 0.000             |
| 3813  | organic acid metabolic process                      | 3.38E-10 | 0.000             |
| 18763 | cellular biosynthetic process                       | 2.34E-09 | 0.000             |
| 5965  | biosynthetic process                                | 7.69E-09 | 0.000             |
| 8587  | mRNA metabolic process                              | 2.25E-08 | 0.000             |
| 18112 | biopolymer metabolic process                        | 1.63E-07 | 0.000             |
| 4073  | translation                                         | 2.02E-07 | 0.000             |
| 18762 | cellular catabolic process                          | 2.70E-07 | 0.001             |
| 14603 | monocarboxylic acid metabolic process               | 3.65E-07 | 0.001             |
| 6776  | cellular process                                    | 7.57E-07 | 0.001             |
| 5963  | catabolic process                                   | 1.19E-06 | 0.002             |
| 7239  | gene expression                                     | 1.25E-06 | 0.002             |
| 18002 | macromolecule metabolic process                     | 1.46E-06 | 0.002             |
| 13152 | regulation of cellular biosynthetic process         | 3.54E-06 | 0.004             |
| 24161 | establishment of localization in cell               | 3.40E-06 | 0.004             |
| 8586  | RNA metabolic process                               | 3.73E-06 | 0.004             |
| 4077  | regulation of translation                           | 6.48E-06 | 0.006             |
|       | nucleobase, nucleoside, nucleotide and nucleic acid |          |                   |
| 3851  | metabolic process                                   | 1.29E-05 | 0.011             |
| 4238  | protein targeting                                   | 1.24E-05 | 0.011             |
| 16446 | cellular macromolecule biosynthetic process         | 1.29E-05 | 0.011             |
| 7380  | posttranscriptional regulation of gene expression   | 1.50E-05 | 0.012             |
| 4153  | amino acid and derivative metabolic process         | 2.37E-05 | 0.016             |
| 4154  | amino acid metabolic process                        | 2.34E-05 | 0.016             |
| 18774 | cellular macromolecule metabolic process            | 2.25E-05 | 0.016             |
| 14086 | regulation of cellular protein metabolic process    | 2.44E-05 | 0.016             |
| 4101  | regulation of translational elongation              | 2.72E-05 | 0.018             |
| 4260  | lipid metabolic process                             | 2.98E-05 | 0.018             |
| 8573  | organic acid biosynthetic process                   | 3.02E-05 | 0.018             |
| 20132 | carboxylic acid biosynthetic process                | 3.02E-05 | 0.018             |
| 20622 | intracellular transport                             | 2.87E-05 | 0.018             |
| 4261  | fatty acid metabolic process                        | 3.36E-05 | 0.019             |
| 4477  | intracellular protein transport                     | 3.34E-05 | 0.019             |
| 18769 | cellular lipid metabolic process                    | 4.33E-05 | 0.023             |
| 24153 | cellular localization                               | 4.33E-05 | 0.023             |
| 23765 | regulation of protein metabolic process             | 5.77E-05 | 0.029             |
| 4074  | translational initiation                            | 6.26E-05 | 0.031             |
| 5578  | lipid biosynthetic process                          | 6.43E-05 | 0.031             |
| 5225  | biological_process                                  | 6.65E-05 | 0.032             |

|       |                                     |          |       |
|-------|-------------------------------------|----------|-------|
| 17103 | response to chemical stimulus       | 8.18E-05 | 0.038 |
| 4415  | nitrogen compound metabolic process | 8.45E-05 | 0.038 |
| 5970  | amino acid catabolic process        | 8.56E-05 | 0.038 |
| 18113 | biopolymer biosynthetic process     | 8.64E-05 | 0.038 |

Gene ontology (GO) term analysis of differentially expressed genes at the HFD:antimiR time point performed with Genespring GX 11.0. No enrichment in “adverse effect-associated GO terms” was detected.
